# Supplementary material for: High resolution vibronic state-specific dissociation of NO2+in the 10.0–15.5 eV energy range by synchrotron double imaging photoelectron photoion coincidence
Source: Royal Society of Chemistry journal article supplement (doi:10.1039/c9cp05847h), 2019-12-16
Supplement: c9cp05847h1.pdf [file c9cp05847h1.pdf]

## Supplementary Information

### High resolution vibronic state-specific dissociation of $\text{NO}_2^+$ in the 10.0-15.5 eV energy range by synchrotron double imaging photoelectron photoion coincidences

Xiaofeng Tang,<sup>a,b\*</sup> Gustavo A. Garcia,<sup>b\*</sup> and Laurent Nahon<sup>b</sup>

<sup>a</sup> Laboratory of Atmospheric Physico-Chemistry, Anhui Institute of Optics and Fine Mechanics, Chinese Academy of Sciences, Hefei, 230031 Anhui, China. E-mail: [tangxf@aiofm.ac.cn](mailto:tangxf@aiofm.ac.cn)

<sup>b</sup> Synchrotron SOLEIL, L'Orme des Merisiers, St. Aubin BP 48, 91192 Gif sur Yvette, France. E-mail: [gustavo.garcia@synchrotron-soleil.fr](mailto:gustavo.garcia@synchrotron-soleil.fr)

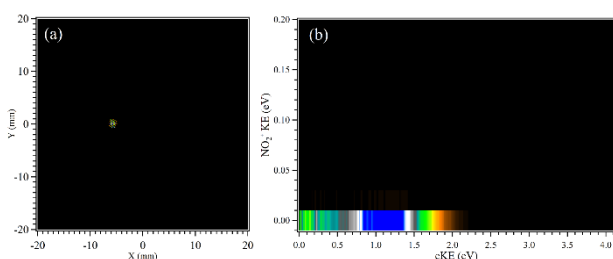

Fig. S1. (a) The ion image of  $\text{NO}_2^+$  and (b) its mass-tagged electron and ion kinetic energy correlation diagram obtained at  $h\nu=12.5$  eV.

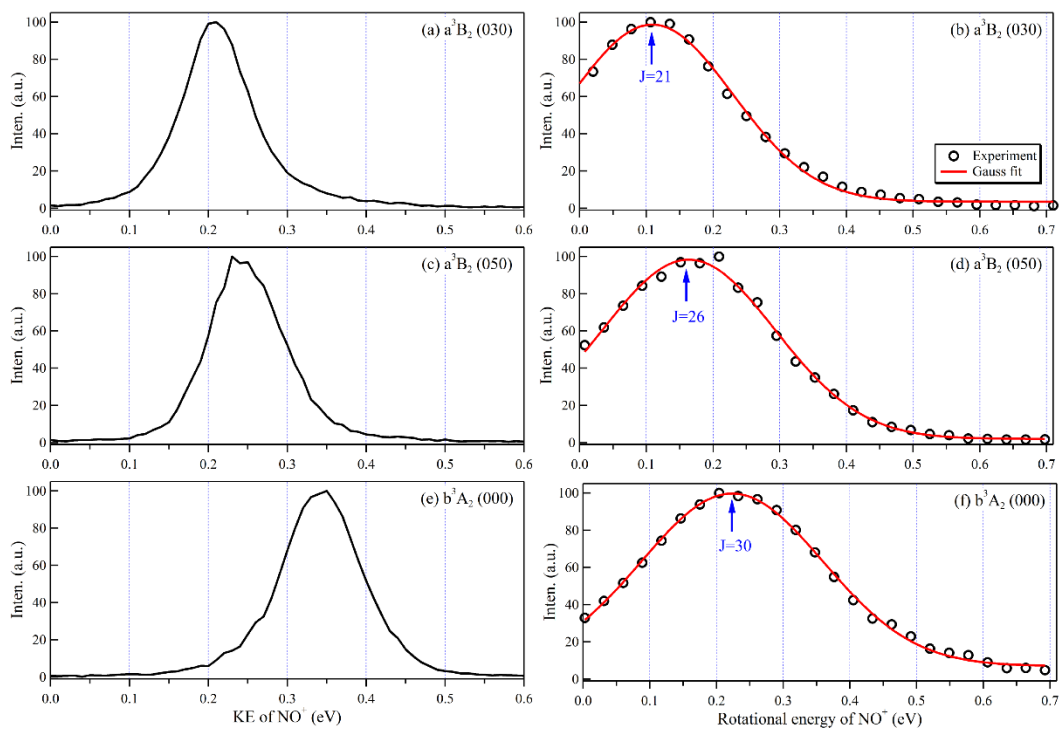

Fig. S2. The kinetic energy distribution (left) and the rotational energy distribution (right) of the  $\text{NO}^+$  fragment ions dissociated from vibronic state-selected  $\text{NO}_2^+$  ions.
